1 **Net effects of field and landscape scale habitat on insect and bird damage to sunflowers**

2

3 Sara M. Kross<sup>1,2,3</sup>, Breanna L. Martinico<sup>2</sup>, Ryan P. Bourbour<sup>2</sup>, Jason M. Townsend<sup>3,4</sup>, Chris McColl<sup>3</sup> & T. Rodd

4 Kelsey<sup>3</sup>

5 1. Department of Ecology, Evolution and Environmental Biology, Columbia University, 1200 Amsterdam

6 Avenue, New York, NY, USA

7 2. Department of Wildlife, Fish and Conservation Biology, University of California, Davis, 1 Shields Ave,

8 Davis, CA, USA

9 3. The Nature Conservancy, 555 Capitol Avenue, Ste 1290, Sacramento CA, USA

10 4. Hamilton College, 198 College Hill Road, Clinton, NY, USA

11

12 Corresponding Author: Sara M Kross. Department of Ecology, Evolution and Environmental Biology,

13 Columbia University, 1200 Amsterdam Avenue, New York, NY, USA [smk2258@columbia.edu](mailto:smk2258@columbia.edu)

14

15 **Abstract**

16 Agriculture-dominated landscapes harbor significantly diminished biodiversity, but are also  
17 areas in which significant gains in biodiversity can be achieved. Planting or retaining woody  
18 vegetation along field margins can provide farmers with valuable ecosystem services while  
19 simultaneously benefitting biodiversity. However, when crops are damaged by the biodiversity  
20 harbored in such vegetation, farmers are reluctant to incorporate field margin habitat onto  
21 their land and may even actively remove such habitats, at cost to both farmers and non-target  
22 wildlife. We investigated how damage by both insect pests (sunflower moth, *Homoeosoma*  
23 *electellum*) and avian pests to sunflower (*Helianthus annuus*) seed crops varied as a function of  
24 bird abundance and diversity, as well as by landscape-scale habitat. Surveys for insect damage,  
25 avian abundance, and bird damage were carried out over two years in 30 different fields on  
26 farms in California's Sacramento Valley. The mean percentage of moth-damaged sunflowers  
27 sampled was nearly four times higher in fields that had bare or weedy margins (23.5%)  
28 compared to fields with woody vegetation (5.9%) and decreased in both field types as  
29 landscape-scale habitat complexity declined. Birds damaged significantly fewer sunflower seeds  
30 (2.7%) than insects, and bird damage was not affected by field margin habitat type, landscape-  
31 scale habitat variables, or avian abundance, but was significantly higher along field edges  
32 compared to  $\geq 50\text{m}$  from the field edge. Avian species richness nearly doubled in fields with  
33 woody margin habitat compared to fields with bare/weedy margins in both the breeding  
34 season and in fall. These results indicate that the benefits of planting or retaining woody  
35 vegetation along sunflower field margins could outweigh the ecosystem disservices related to

36 bird damage, while simultaneously increasing the biodiversity value of intensively farmed  
37 agricultural landscapes.

38 **Keywords:** agroecology, crop damage, ecosystem services, farm, hedgerow, integrated pest  
39 management, pest control, landscape

40

#### 41 **Introduction**

42 In the face of significant losses of both diversity and abundance of avian species (Rosenberg et  
43 al. 2019), farming agroecosystems represent a critical frontline for improving vast tracts of land  
44 for breeding, migrating, and overwintering birds. Agricultural intensification can drive  
45 biodiversity loss, but, paradoxically, agricultural systems rely on the ecosystem services  
46 provided by biodiversity (Johnson et al. 2017). Establishing and protecting agroecosystems that  
47 take advantage of functional diversity to provide ecosystem services at the farm and landscape  
48 level is a way to simultaneously decrease chemical inputs and increase biodiversity (Daily et al.  
49 2000, Weier et al. 2018, Kleijn et al. 2019). To this end, there have been calls for biodiversity  
50 conservation to be expanded beyond the reserve system, for example by conserving and  
51 promoting functional diversity in expansive agricultural settings (Kremen and Merenlender  
52 2018, Grass et al. 2019). Bringing together these two mindsets can create a win-win situation  
53 for both conservation and agriculture. For example, establishing or maintaining strips of woody  
54 vegetation along field margins can increase the diversity, abundance, and corresponding  
55 ecosystem services, of pollinators (Garibaldi et al. 2011, M’Gonigle et al. 2015, Sardiñas et al.  
56 2016), arthropod predators (Eilers & Klein 2009; Gareau, Letourneau & Shennan 2013), and  
57 birds (Heath *et al.* 2017).

58 Farmers are the primary decision makers for land management choices within  
59 agricultural regions, and their decisions are mostly based on direct economic returns (Kleijn et  
60 al. 2019). Birds are highly detrimental pests to a number of crops worldwide (De Grazio 1978,  
61 Gebhardt et al. 2011, Kross et al. 2012, Schäckermann et al. 2014), although the actual costs of  
62 bird foraging on crops are rarely quantified because the timing of bird damage often overlaps  
63 with crop harvesting. Farmers that perceive birds as detrimental to their crops will take action  
64 to deter birds (Kross et al. 2018), often by removing field margin habitat (Gennet et al. 2013) or  
65 utilizing commercially available bird deterrents such as gas guns, reflective tape, or netting  
66 (Baldwin et al. 2013), all of which can be costly for both farmers and non-target wildlife. Bird  
67 depredation of crops therefore not only has direct economic implications for growers, but can  
68 lead farmers to oppose conservation programs within agricultural communities and on their  
69 own properties (Kross et al. 2018).

70 Studies into the detrimental behaviors of birds rarely focus on potentially beneficial  
71 impacts, and similarly, studies into the beneficial pest-control services of birds rarely focus on  
72 the fact that the same species may cause damage to crops (Pejchar et al. 2018) with a few  
73 recent exceptions (Peisley et al. 2016, Gonthier et al. 2019). The effects of natural vegetation  
74 on biological control can vary with crop type, seasonality, farm management, and the  
75 demographic effects of interactions between natural enemies and pests (Karp et al. 2018,  
76 Settele and Settle 2018). Therefore, disentangling the complex relationships between  
77 landscape- and field-level habitat complexity and crop damage from insect and avian pests- and  
78 communicating these results to farmers and policymakers- has critical implications for habitat  
79 management in agroecosystems.

80           In California, one of the world’s most productive and intensive farming regions, less  
81 than 4% of potential field margins have been planted with woody vegetation such as  
82 hedgerows (Brodt et al. 2009); field margins therefore have significant potential for increasing  
83 the biodiversity conservation value of farmland. However, farmers rank uncertainty around the  
84 potential benefits of hedgerows and the possibility that these hedgerows could harbor plant,  
85 insect and vertebrate pests as constraints to adopting the practice (Brodt et al. 2009). Research  
86 to provide information about the costs and benefits of retaining or planting such habitats is  
87 therefore critical to inform land management decisions. Here, we present a study to investigate  
88 the effects of field-margin and landscape-scale habitat on insect and bird damage to sunflower  
89 (*Helianthus annuus*) crops in California.

## 90 MATERIALS and METHODS

### 91 *Study Area and Crop*

92           California’s Central Valley runs 724 kilometers north-south and covers a total of 10.9  
93 million hectares (26.9 million acres). It is one of the most productive agricultural landscapes in  
94 the world, producing over 25% of the fresh produce consumed in the United States (USDA  
95 2015), and valued at over \$45 billion (USD) per year. Over 95% of the Central Valley’s riparian  
96 and wetland ecosystems have been replaced by highly intensive agriculture and urban  
97 development (Katibah 1984, Frayer et al. 1989), with remnant native habitat existing only in  
98 fragmented and isolated patches. Nevertheless, some native biodiversity in this region persists  
99 despite the highly human-modified landscape (Heath et al. 2017).

100           Each year, sunflower is grown for hybrid seed production on an average of 20,234ha  
101 (50,000 acres) across California’s Sacramento Valley, producing over 31,750 tons valued at

102 approximately \$70 million/year (Long et al. 2019). California's Central Valley produces over 95%  
103 of the United States' hybrid sunflower seeds, and over 25% of global sunflower seeds (Long et  
104 al. 2019). Sunflowers grown for seed are valued at five to ten times that of the commercial oil  
105 crops for which they are used (Long et al. 2019), and growers therefore have a low threshold  
106 for damage. All sunflower fields in our study were grown for the same seed company and  
107 therefore were grown using the same field-management practices. This study was conducted  
108 within conventional fields (i.e. non-organic fields), but no growers reported utilizing insecticides  
109 on their fields over the duration of this study.

110         The predominant insect pest for sunflowers in North America is the sunflower moth  
111 (*Homoeosoma electellum*). Female sunflower moths lay eggs among the florets of sunflowers in  
112 early bloom, and eggs take 2-5 days to hatch. After hatching, larvae remain on the face of  
113 flowers for 8 days before boring into the developing seeds where they can cause losses of 30-  
114 60% of a crop (Long et al. 2019). Birds are also a key pest of sunflower crops around the world  
115 (De Grazio 1978, Schäckermann et al. 2014, Long et al. 2019, Ernst et al. 2019). Within a field,  
116 bird damage to sunflowers is often concentrated to the edges nearest to habitat that can act as  
117 shelter for birds. For example, in Israel, bird damage within a field was highest in areas close to  
118 trees (>5m in height), but increasing the number of trees within a 1-km radius of fields was not  
119 associated with higher damage (Schäckermann et al. 2014), suggesting that presence of habitat  
120 along edges of crops prone to bird damage is more important than the presence of habitat in  
121 the landscape overall.

122 *Field- and Landscape- Habitat Complexity*

123           We conducted bird counts and collected sunflower damage data from six fields with  
124 woody margin habitat and seven fields with bare or weedy field margins in 2014, and from 12  
125 complex fields and 5 simple fields in 2015, for a total of 30 fields sampled. To quantify local  
126 (field) habitat complexity, we collected data on the height, width, and number of canopy layers  
127 of field margin vegetation at 5 locations along each transect (see Heath et al. 2017 for details).  
128 To quantify and incorporate landscape habitat complexity into our study design, we selected  
129 fields at varying distances from natural habitat, which in our study area consists mainly of  
130 remnant and restored riparian areas (Figure 1). We used pre-existing habitat data for our study  
131 area (CA DWR 2008, Geographic Information Center 2009), and added by hand any trees within  
132 800m of each transect that were not included in the existing dataset (e.g. trees lining  
133 driveways, trees around homesteads). To calculate the distance to riparian area, we used  
134 ArcGIS 10.1 (ESRI 2010) to create a distance raster that encompassed the entire study area by  
135 using the Euclidean distance algorithm. We used the riparian vegetation GIS dataset (habitats  
136 classified as native riparian, blue oak woodland, valley foothill riparian, fresh emergent  
137 wetland, saline emergent wetland, and valley foothill riparian) as the ‘source’ input for the  
138 algorithm and set the output grid cell size to 10 meters. Each field’s transect center point was  
139 then buffered by 50 meters, and we calculated the distance from each grid cell within the  
140 buffer to the nearest riparian vegetation polygon. The mean distance for all cells within each  
141 buffer was calculated as the distance value for each field. We also calculated the mean  
142 proportion area consisting of natural habitat (Appendix 1) at concentric buffer distances of  
143 100m, 200m, 400m, and 800m, which have been shown to be relevant scales for riparian bird  
144 species in the Central Valley (Seavy et al. 2009).

145 *Vertebrate Exlosures*

146           In 2015, we created exclosures to prevent vertebrates (birds and bats) from accessing  
147 sunflowers (see Maas et al. 2019 for a review of exclosure methods). Exclosures consisted of  
148 nylon bird netting (No-Knot Bird Netting  $\frac{3}{4}$ " polypropylene mesh, Bird B Gone Inc<sup>®</sup>, Irvine, CA)  
149 draped over an area 4 rows of sunflowers in width and approximately 20 flowers in length and  
150 secured to cover the tops of the flowers to a height of approximately 2-4 feet above the  
151 ground. Exclosures were installed in late spring, prior to the onset of bloom (which is when  
152 sunflower moth typically lay eggs on the flowers), and were checked and maintained over the  
153 entire growing season until final damage estimates were made. We set up four exclosures in  
154 each field, with the closest end of each exclosure located 5m, 10m, 50m, and 100m from the  
155 edge of the field. Due to last minute changes in the harvest schedule at some fields, we were  
156 able to collect damage data from the exclosures at nine different fields. All experiments were  
157 carried out in accordance with the University of California's Institutional Animal Care and Use  
158 Committee approved protocol #18033

159

160 *Sunflower damage*

161           We quantified both bird and insect damage by visually inspecting each of ten sunflowers  
162 within each sampling area. Sunflowers were chosen by reaching out to select a plant stalk, so  
163 the seed-bearing area of each plant was not seen until after the plant was selected (most  
164 sunflowers were at or above head-height for observers). Observers moved a few steps along  
165 and between rows to select each new flower. Bird damage was characterized by missing seeds.  
166 We were careful to avoid classifying wind-damaged seeds that had been rubbed off of



167 sunflowers by a neighboring flower as bird damage. These seeds were generally removed from  
168 larger continuous areas of the sunflower head, whereas seeds removed by birds were in patchy  
169 sections or removed singularly. Wind-damaged seeds were also often seen whole on the  
170 ground underneath the plants. Insect damage was characterized by an area of visible frass  
171 (insect excrement and webbing) on the surface of multiple sunflower seeds. Seeds under the  
172 frass were often shrunken or visibly damaged. All areas that were under frass were classified as  
173 insect-damaged.

174 To estimate the percent of seeds on each sunflower that were damaged, we used a pre-cut  
175 circular piece of galvanized steel chicken-wire that was marked to allow for easy measurement  
176 of the flowers. Sunflower heads were classified into different size classes based on the diameter  
177 (to the nearest 1.3 cm, or 0.5 inches) of the seed-bearing area on each plant. We then  
178 estimated the number of hexagons on the wire (to the nearest  $\frac{1}{4}$  hexagon) that was damaged  
179 by birds or damaged by insects on each sunflower head. Using the flower circumference and  
180 the known area within each hexagon of our grid, we were then able to calculate the percent of  
181 each sunflower head that was damaged by birds, and the total that was damaged by insects. To  
182 estimate yield, damage from insects and damage from birds were summed for a total percent  
183 damage to each sunflower, since both types of damage result in a direct loss of yield for  
184 growers.

185 We sampled from 10 sunflowers at distances from 0m to 200m from the field edge. In 2014,  
186 we collected observations of both insect and bird damage from each site at 0, 10, 20, 30, 40, 50,  
187 75, 100, 150, and 200m from the field edge. In 2015, we collected observations from each site  
188 at 5, 10, 50, and 100m from the field edge because we found in 2014 that bird damage dropped

189 to close to 0 at distances beyond 50m, and that insect damage was largely unchanged by  
190 distance from the field edge (see Figure 2). Estimates for insect and bird damage in 2015 were  
191 taken from sunflowers within exclosures and from sunflowers that were approximately 10m  
192 from the exclosures (parallel to the field margin), but only data from non-enclosed sunflowers  
193 was used in our comparative analysis of insect damage.

#### 194 *Bird counts*

195 We conducted four bird surveys at each site, two in summer (June 9- July 2) and two in  
196 fall (August 5- September 16). All bird surveys were conducted by trained observers and timed  
197 to coincide with sunflower bloom in the summer (when sunflower moths typically lay eggs on  
198 the flowers), and immediately prior to the seed harvest in the fall. All counts were conducted  
199 between dawn and 10am and were not conducted in very cold (<3C) or very hot weather  
200 (>24C), in high winds or heavy precipitation. Counts were also re-scheduled if there were any  
201 farm workers or machinery in our focal field. We conducted two counts per visit at each field:  
202 one to quantify the birds utilizing the field margin habitat, and another to quantify the birds  
203 utilizing the field interior. These methods provide relative values for comparing inter-site bird  
204 communities. To count birds utilizing field margin habitat, observers walked a 200m transect  
205 slowly over 10 minutes, counting all detectable birds by sight or sound within 20m of the field  
206 margin, but not within the field itself. To count birds utilizing the field interior, observers  
207 returned to the mid-point of the transect, allowed five minutes for birds to settle, and then  
208 conducted a 10-minute point count focused only on birds that were observed within the field.  
209 We counted all birds detected within each field because each species was assumed to have  
210 similar detectability in all fields, since sunflowers were at similar levels of maturation and

211 height at the time of each count, and since fields were all of a similar size. We used different  
212 methods for the edge and interior transects to maximize our detection of birds utilizing each  
213 type of habitat. While these methods may result in counting the same individual in both  
214 habitats on the same visit, this is relevant since birds at our study sites were regularly observed  
215 using both the field margin and field interior habitats.

216

### 217 *Statistical Analyses*

218         Because the variables describing field margin habitat (height, width, and number of  
219 vegetation layers) were highly correlated, we used a Principle Components Analysis (PCA) to  
220 reduce these into two orthogonal axes that explained over 95.5% of the variance among them.  
221 The two axes, PC1 and PC2, were included as predictor variables in our candidate models for  
222 sunflower damage and for bird abundance and richness. PC1 explained 86.2% of the variability  
223 among habitat variables and was negatively associated with all three variables, whereas PC2  
224 was positively associated with habitat width and height, and negatively associated with habitat  
225 layers. Therefore, if PC1 is a positive predictor of damage, we would expect less damage at sites  
226 with habitat that is taller, wider and has more layers (because of the inverse relationship). If  
227 PC2 is a positive predictor of damage, we would expect less damage at sites with more habitat  
228 layers and more damage at sites with taller/wider habitat. We also found collinearity among  
229 the predictor variables for landscape-scale habitat complexity, so constructed separate models  
230 for each landscape-scale habitat complexity variable. Model selection revealed that the  
231 variable for mean distance to natural habitat was most parsimonious in our sunflower damage  
232 models (Tables S1-2), so we present the results from that model in the main text of this paper.

233 We used a Wilcoxon rank-sum test to compare the total insect damage observed inside  
234 enclosures and in adjacent non-enclosure locations. For all other analyses, only the data from  
235 the non-enclosure locations were used for investigating the effects of habitat variables on  
236 sunflower damage.

237 For both damage categories, we used generalized linear models with a negative  
238 binomial family of errors to analyze our data on percent damage to sunflowers in R v.3.3.1 .  
239 Sunflower moth damage and bird damage were analyzed in separate models. For our bird  
240 abundance and richness data, we ran eight separate linear regressions for avian species  
241 richness and abundance along the field edge and within the field interior for data collected in  
242 summer and in fall. For all analyses, we included as predictor variables in our maximal models  
243 the continuous variables for the distance from the nearest riparian habitat, PC1, and PC2, as  
244 well as the categorical variable for whether the field had a weedy or bare edge (simple edge  
245 habitat) or had woody field margin habitat (complex edge habitat). We simplified the maximal  
246 models by removing interactions, then main effects, until no further reduction in residual  
247 deviance (measured using Akaike's Information Criterion) was obtained. For all regression  
248 analyses, we considered candidate models with  $\Delta AIC \leq 2$  and chose the most parsimonious  
249 model.

#### 250 *Economic Estimates*

251 We used published data on the range and mean sunflower yields and economic value for the  
252 Sacramento Valley from 2015-2018 (Long et al. 2018) to calculate the reduction in gross  
253 earnings for farmers as a result of insect and bird damage in response to significant predictor  
254 variables. Mean sunflower yields were 1,260 lbs/acre (1,412kg/ha; range 1,076-1,748 kg/ha)

255 after seed companies clean and remove nonviable seeds and non-seed material from field  
256 harvests (Long et al. 2018). Seeds were valued at a mean value of \$1.2/lb (\$0.54/kg; range of  
257 \$0.41-0.68/kg (Long et al. 2018)). We calculated the economic effect size of insect or bird  
258 damage by multiplying the scaled effect sizes from our model estimates.

259

## 260 **RESULTS**

### 261 *Vertebrate Exlosures*

262 There was no significant difference between sunflower damage from insects inside exclosures  
263 (mean= 3.40 ± 0.61% damage) compared to areas outside of exclosures that birds and bats  
264 could access (mean= 3.08 ± 0.47% damage).

265

### 266 *Sunflower damage*

267 Sunflower moth damage was almost four-times higher at sites with bare or weedy field margin  
268 habitat (23.46 ± 1.41%) compared to sites with woody vegetation along field margin habitat  
269 (5.89 ± 1.16%;  $z = 7.12$ ,  $p < 0.001$ ). There was a slight decrease in sunflower moth damage as  
270 PC2 increased ( $z = -2.75$ ,  $p = 0.005$ ; Figure 2a), and a significant reduction in damage as distance  
271 from natural habitat increased ( $z = -2.25$ ,  $p = 0.02$ ; Figure 2b). Bird damage was highest at the  
272 edge of fields, regardless of the presence of field margin habitat, and dropped quickly to near  
273 0% within 50m of the field edge (Figure 2c). This effect was driven entirely by distance from  
274 field edge, with only the linear ( $z = -4.45$ ,  $p < 0.001$ ) and quadratic values ( $z = 2.98$ ,  $p = 0.003$ ) for  
275 distance from field edge retained in the final model.

276

277 *Economic Estimates*

278 Our models estimate that at sites adjacent to natural vegetation, farmers would expect to lose  
279 \$877/ha in lost yields due to sunflower moth damage at sites with bare/weedy vegetation  
280 along the field margin, compared to \$220/ha in lost yields due to sunflower moth damage at  
281 sites with woody vegetation. To put this into perspective, the mean cost of applying insecticides  
282 to treat for sunflower moth is \$292/ha, so our results suggest that fields in this scenario would  
283 be likely to remain under an economic threshold to trigger growers to apply insecticides. In the  
284 same scenario, bird damage at the field edge would result in \$100 in lost yields but that would  
285 decline to negligible damage within 50m of the field edge.

286

287 *Bird results*

288 Species richness of complex fields was higher in fields with woody margins in both  
289 summer ( $19.70 \pm 0.91$ ) and fall ( $16.0 \pm 1.04$ ) compared to fields with bare/weedy margins in  
290 summer ( $10.4 \pm 0.96$ ) and fall ( $8.17 \pm 0.67$ ). We observed 70 different avian species during our  
291 summer counts, and 74 species during our fall counts. These included California 'Bird Species of  
292 Special Concern' (Shuford & Gardali 2008) like northern harrier (*Circus hudsonius*), yellow  
293 warbler (*Setophaga petechia*), and California 'Threatened' species like Swainson's hawk (*Buteo*  
294 *swainsoni*), and tri-colored blackbird (*Agelaius tricolor*, 13 individuals observed at one site).  
295 During our summer counts, 64 different bird species utilized sunflower field edges and 49  
296 species utilized field interiors. During our fall counts, we observed 69 species utilizing sunflower  
297 field edges and 46 species utilizing field interiors. Further details of bird species observed can  
298 be found in Bourbour et al. (In prep).

299 For our summer counts, avian species richness ( $t = -5.44$ ,  $p < 0.001$ , Figure 3a) and  
300 abundance ( $t = -5.47$ ,  $p < 0.001$ , Figure 3b) along field edges had a strong negative correlation  
301 with PC1. Since PC1 was negatively associated with all three measures of field margin habitat  
302 complexity (habitat height, width, and number of canopy layers), our results predict that as  
303 field margin habitat becomes more complex, avian richness and abundance along field edges  
304 increased. For summer field interiors, avian species richness was uncorrelated with PC1 ( $t = -$   
305  $1.83$ ,  $p = 0.08$ , Figure 3c). None of our predictor variables were retained in the model for avian  
306 abundance within the field interior in summer.

307 In the fall, field edge richness, field edge abundance, and field interior abundance were  
308 all positively associated with increasing field margin habitat complexity. Field edge avian  
309 species richness was negatively associated with PC1 ( $t = -9.82$ ,  $p < 0.001$ , Figure 3e), PC2 ( $t = -$   
310  $2.80$ ,  $p < 0.01$ ) and average distance to nearest riparian habitat ( $t = -2.30$ ,  $p = 0.03$ ). Avian  
311 abundance at the field edge in fall was negatively associated with PC1 ( $t = -23.40$ ,  $p < 0.001$ ,  
312 Figure 3f). Avian species richness in field interiors during the fall was not correlated with edge  
313 complexity or distance to riparian habitat. Avian abundance was significantly higher at sites  
314 with weedy/bare edges, compared to sites with woody vegetation (mean of 109 more birds at  
315 simple sites;  $t = 2.33$ ,  $p = 0.03$ ), but increased in both bare/weedy and woody vegetation field  
316 margin types with increasing field margin habitat complexity ( negatively association with PC1;  $t$   
317  $= -2.31$ ,  $p = 0.03$ , Figure 3h).

318

319 DISCUSSION

320 Our results suggest that sunflower growers would benefit from planting or maintaining  
321 woody vegetation alongside their fields since sunflower moth damage was significantly higher  
322 at sites without field margin vegetation, while bird damage was not driven by field margin  
323 habitat. Furthermore, within sunflower fields across all distances from the field margin,  
324 sunflower moth damage was significantly higher than bird damage, and was therefore the main  
325 source of yield loss for sunflower growers in our area. The pest control service benefits that  
326 farmers receive from field margin vegetation therefore outweigh the potential ecological  
327 disservices associated with bird damage to sunflowers. In fact, bird damage at our 30 fields was  
328 similar across sites with and without field margin habitat. Our results also indicate a clear  
329 benefit for biodiversity, with significantly higher species richness and avian abundance along  
330 field edges that had woody habitat. Combined, these results support the assertion that  
331 diversified farming systems can provide both farmers and broader society with multiple  
332 additive ecosystem services (Kremen & Miles 2012).

333 Our exclosures did not reveal an effect of bird foraging on sunflower moth damage. This  
334 could be the result of small sample size (n=36 exclosures in 9 fields), or these results could  
335 indicate that foliage-gleaning birds and bats are not a major predator of sunflower moth. We  
336 predict that the patterns of sunflower moth damage we observed were driven by either  
337 increased predation pressure from invertebrates or from aerially-hunting bats and birds. If  
338 adult moths are depredated in flight, prior to ovidepositing on flowers, our exclosures would  
339 not have detected an effect of aerially-hunting vertebrate predators such as bats and birds.  
340 Whereas if most depredation occurs to adult moths as they lay eggs, to the eggs themselves, or  
341 to larvae, our exclosures would have indicated if vertebrate predators were the cause. Because



342 of their nocturnal nature, sunflower moth adults are likely to be targeted more by nocturnal  
343 arthropod predators and/or bats (both of which would not be affected by the presence of  
344 exclosures) than by the predominantly diurnal avian predators. There is also a possibility that  
345 the presence of woody vegetation creates a physical barrier to fields or that sunflower moths  
346 avoid areas near woody vegetation because of the potential for higher predation. Further  
347 research is clearly needed in this system.

348         The value of insect pest control provided to US farmers by beneficial insects was  
349 estimated at \$4.5 billion per year in 2006 (Losey and Vaughan 2006), and the value of insect  
350 pest control provided to farmers of corn globally was estimated to be worth over \$1 billion per  
351 year in 2015 (Maine and Boyles 2015). Studies in California have shown that the presence of  
352 habitat along field margins is associated with increased diversity and abundance of beneficial  
353 insects including natural enemies (Eilers and Klein 2009, Gareau et al. 2013, Morandin et al.  
354 2014), and with increased bat activity (Kelly et al. 2016). For example, in almond orchards,  
355 higher proportions of natural habitat surrounding orchards resulted in higher parasitoid and  
356 vertebrate control of the naval orangeworm (Eilers and Klein 2009, Morandin et al. 2014).

357         Our model selection process revealed that the distance to nearest natural vegetation  
358 was the strongest of our landscape-scale predictors of sunflower damage (Table S2). This  
359 variable has been shown to be a significant predictor of bird use of agricultural fields in our  
360 study region (Kross et al. 2016, Heath et al. 2017) since the landscape is largely dominated by  
361 farm fields, with widely spaced corridors of natural habitat along riparian areas, and farmsteads  
362 acting as small islands of natural habitat (Figure 1). In this landscape, hedgerows themselves are

363 an important sources of pollination services (Sardiñas et al. 2016) and for supporting pollinator  
364 metacommunity dynamics (Ponisio et al. 2019)

365         The benefits and costs of bird presence on farms are complicated (Pejchar et al. 2018).  
366 Individual species can be beneficial to a crop in some seasons and detrimental in others, or may  
367 benefit one crop and cause damage to another. Birds may also disrupt other natural trophic  
368 cascades that benefit farmers (Grass et al. 2017). Seasonality of avian foraging guilds is  
369 important, and often overlooked by either those interested in describing only pest-control  
370 services or those interested in describing only damage from pest bird species. For example, red-  
371 winged blackbirds (*Agelaius phoeniceus*) are a notorious pest of sweet corn crops in the North  
372 American Midwest in late summer and early fall when corn kernels are ripening, but these  
373 abundant birds also consume large quantities of a number of insect pests of corn in spring and  
374 early summer (Dolbeer 1990; Tremblay, Mineau & Stewart 2001). In sunflowers, some species  
375 considered to be major pests of sunflower crops, including blackbird species (Icteridae) and  
376 European starlings (*Sturnus vulgaris*), are insectivorous during the breeding season - the time of  
377 year that sunflowers are attacked by insect pests, including sunflower head moth. These  
378 species later become pests when they switch to a primarily granivorous diet in the fall. Farmers  
379 may therefore want to retain, or even encourage, blackbird populations on their land in spring  
380 and summer, and then utilize bird deterrent techniques, alternative food sources, and bird-  
381 resistant cultivars to reduce damage from birds once crops become susceptible. Importantly,  
382 while our results indicate a net benefit of hedgerows for both sunflower yields and avian  
383 diversity in California, sunflowers in other regions (Schäckermann et al. 2014, Ernst et al. 2019)  
384 suffer from economically significant bird-damage to the same crop. Therefore, we caution that

385 land managers and scientists should consider local climate, habitat availability, agricultural  
386 practices, and avian communities before translating our findings into management changes in  
387 other regions.

388

## 389 CONCLUSIONS

390 Contrary to common assumptions about avian pests, we found that sunflower fields with  
391 woody vegetation along their margins did not suffer from significantly higher bird damage  
392 compared with fields that had weedy or bare edges. Instead, overall sunflower seed yield was  
393 driven by insect damage, which was lower in fields with vegetated margins. Our results show  
394 that planting or retaining woody vegetation along field margins can simultaneously decrease  
395 insect pest damage to crops (Figure 2) and increase the biodiversity value of sunflower fields for  
396 birds (Figure 3), adding to the growing body of scientific studies that demonstrate the benefits  
397 of planting or retaining habitat for wildlife along field margins. These results are particularly  
398 important for avian conservation in intensive agricultural landscapes, where little natural  
399 habitat remains and significant gains in habitat may be made through restoration activities  
400 along the ~96% of field margins in California that are currently bare. Our results demonstrate  
401 one case where increasing the habitat value of non-production areas in intensive, conventional  
402 farming systems may simultaneously increase yield and benefit biodiversity.

403

## 404 AUTHOR'S CONTRIBUTIONS

405 SMK, TRK and JMT conceived the ideas and designed methodology; SMK, BLM, RPB and field  
406 assistants collected the data; CM performed the landscape analysis; SMK analyzed the data;

407 SMK led the writing of the manuscript. All authors contributed critically to the drafts and gave  
408 final approval for publication.

409

#### 410 ACKNOWLEDGEMENTS

411 We thank the landowners and growers who provided access and information for this study  
412 especially Button & Turkovich, Joe Muller & Sons, Bullseye Farms, Citrona Farms, and Bypass  
413 Farms. Pioneer Hi-Bred International allowed for this research to be conducted, and we  
414 received significant logistical advice from A. Anderson. We also received invaluable study design  
415 advice from R. Long and numerous local pest control advisors. K. Shaw, S. Lei, and E. Barry  
416 helped with field work. Fieldwork was funded by the David H. Smith Conservation Research  
417 Fellowship to SMK, who was hosted by J. Eadie at UC Davis.

418

#### 419 DATA ACCESSIBILITY

420 Data will be made available from the Columbia University Library Digital Repository.

421

422 Online Appendices:

423 Supplementary Table 1: Model selection for candidate models explaining sunflower moth  
424 damage to sunflower seeds using the distance to nearest natural habitat as a measure of  
425 landscape-scale habitat complexity.

426 Supplementary Table 2: Model selection for candidate models explaining sunflower moth  
427 damage to sunflower seeds using, as a measure of landscape-scale habitat complexity, the  
428 proportion of natural habitat within concentric distance buffers from each site.

429

430

#### 431 LITERATURE CITED

- 432
- 433 Baldwin, R. A., T. P. Salmon, R. H. Schmidt, and R. M. Timm. 2013. Wildlife pests of California  
434 agriculture: Regional variability and subsequent impacts on management. *Crop*  
435 *Protection* 46:29–37.
- 436 Brodt, S., K. Klonsky, L. Jackson, S. B. Brush, and S. Smukler. 2009. Factors affecting  
437 adoption of hedgerows and other biodiversity-enhancing features on farms in  
438 California, USA. *Agroforestry Systems* 76:195–206.
- 439 CA DWR. 2008. Department of Water Resources: Yolo County Land Use GIS dataset.  
440 Sacramento, CA.
- 441 Daily, G. C., T. Soderqvist, S. Aniyar, K. Arrow, P. Dasgupta, P. R. Ehrlich, C. Folke, A. Jansson,  
442 B. O. Jansson, N. Kautsky, S. Levin, J. Lubchenco, K. G. Maler, D. Simpson, D. Starrett,  
443 D. Tilman, and B. Walker. 2000. Ecology - The value of nature and the nature of  
444 value. *Science* 289:395–396.
- 445 De Grazio, J. W. 1978. World bird damage problems. Proceedings of the 8th Vertebrate Pest  
446 Conference.
- 447 Eilers, E. J., and A. M. Klein. 2009. Landscape context and management effects on an  
448 important insect pest and its natural enemies in almond. *Biological Control* 51:388–  
449 394.
- 450 Ernst, K., J. Elser, G. Linz, H. Kandel, J. Holderieath, S. DeGroot, S. Shwiff, and S. Shwiff. 2019.  
451 The economic impacts of blackbird ( *Icteridae* ) damage to sunflower in the USA.  
452 *Pest Management Science*.
- 453 ESRI. 2010. ArcGIS Desktop 10.1. Environmental Systems Research Institute, Redlands, CA.

- 454 Frayer, W. E., D. D. Peters, H. R. Pywell, and U. S. Fish and Wildlife Service. 1989. Wetlands  
455 of the California Central Valley: status and trends.
- 456 Gareau, T. L. P., D. K. Letourneau, and C. Shennan. 2013. Relative Densities of Natural  
457 Enemy and Pest Insects Within California Hedgerows. *Environmental Entomology*  
458 42:688–702.
- 459 Garibaldi, L. A., I. Steffan-Dewenter, C. Kremen, J. M. Morales, R. Bommarco, S. A.  
460 Cunningham, L. G. Carvalheiro, N. P. Chacoff, J. H. Dudenhöffer, S. S. Greenleaf, A.  
461 Holzschuh, R. Isaacs, K. Krewenka, Y. Mandelik, M. M. Mayfield, L. A. Morandin, S. G.  
462 Potts, T. H. Ricketts, H. Szentgyörgyi, B. F. Viana, C. Westphal, R. Winfree, and A. M.  
463 Klein. 2011. Stability of pollination services decreases with isolation from natural  
464 areas despite honey bee visits: Habitat isolation and pollination stability. *Ecology*  
465 *Letters* 14:1062–1072.
- 466 Gebhardt, K., A. M. Anderson, K. N. Kirkpatrick, and S. A. Shwiff. 2011. A review and  
467 synthesis of bird and rodent damage estimates to select California crops. *Crop*  
468 *Protection* 30:1109–1116.
- 469 Gennet, S., J. Howard, J. Langholz, K. Andrews, M. D. Reynolds, and S. A. Morrison. 2013.  
470 Farm practices for food safety: an emerging threat to floodplain and riparian  
471 ecosystems. *Frontiers in Ecology and the Environment* 11:236–242.
- 472 Geographic Information Center. 2009. Vegetation – Central Valley Riparian and Sacramento  
473 Valley [ds1000].
- 474 Gonthier, D. J., A. R. Sciligo, D. S. Karp, A. Lu, K. Garcia, G. Juarez, T. Chiba, S. Gennet, and C.  
475 Kremen. 2019. Bird services and disservices to strawberry farming in Californian  
476 agricultural landscapes. *Journal of Applied Ecology*.

- 477 Grass, I., K. Lehmann, C. Thies, and T. Tschardt. 2017. Insectivorous birds disrupt  
478 biological control of cereal aphids. *Ecology* 98:1583–1590.
- 479 Grass, I., J. Loos, S. Baensch, P. Batáry, F. Librán-Embí, A. Ficiciyan, F. Klaus, M. Riechers, J.  
480 Rosa, J. Tiede, K. Udy, C. Westphal, A. Wurz, and T. Tschardt. 2019. Land-sharing/  
481 sparing connectivity landscapes for ecosystem services and biodiversity  
482 conservation. *People and Nature*.
- 483 Heath, S. K., C. U. Soykan, K. L. Velas, R. Kelsey, and S. M. Kross. 2017. A bustle in the  
484 hedgerow: Woody field margins boost on farm avian diversity and abundance in an  
485 intensive agricultural landscape. *Biological Conservation* 212:153–161.
- 486 Johnson, C. N., A. Balmford, B. W. Brook, J. C. Buettel, M. Galetti, L. Guangchun, and J. M.  
487 Wilmshurst. 2017. Biodiversity losses and conservation responses in the  
488 Anthropocene. *Science* 356:270–275.
- 489 Karp, D. S., R. Chaplin-Kramer, T. D. Meehan, E. A. Martin, F. DeClerck, H. Grab, C. Gratton, L.  
490 Hunt, A. E. Larsen, A. Martínez-Salinas, M. E. O'Rourke, A. Rusch, K. Poveda, M.  
491 Jonsson, J. A. Rosenheim, N. A. Schellhorn, T. Tschardt, S. D. Wratten, W. Zhang, A.  
492 L. Iverson, L. S. Adler, M. Albrecht, A. Alignier, G. M. Angelella, M. Zubair Anjum, J.  
493 Avelino, P. Batáry, J. M. Baveco, F. J. J. A. Bianchi, K. Birkhofer, E. W. Bohnenblust, R.  
494 Bommarco, M. J. Brewer, B. Caballero-López, Y. Carrière, L. G. Carvalheiro, L.  
495 Cayuela, M. Centrella, A. Četković, D. C. Henri, A. Chabert, A. C. Costamagna, A. De la  
496 Mora, J. de Kraker, N. Desneux, E. Diehl, T. Diekötter, C. F. Dormann, J. O. Eckberg, M.  
497 H. Entling, D. Fiedler, P. Franck, F. J. Frank van Veen, T. Frank, V. Gagic, M. P. D.  
498 Garratt, A. Getachew, D. J. Gonthier, P. B. Goodell, I. Graziosi, R. L. Groves, G. M. Gurr,  
499 Z. Hajian-Forooshani, G. E. Heimpel, J. D. Herrmann, A. S. Huseeth, D. J. Inclán, A. J.

500 Ingrao, P. Iv, K. Jacot, G. A. Johnson, L. Jones, M. Kaiser, J. M. Kaser, T. Keasar, T. N.  
501 Kim, M. Kishinevsky, D. A. Landis, B. Lavandero, C. Lavigne, A. Le Ralec, D. Lemessa,  
502 D. K. Letourneau, H. Liere, Y. Lu, Y. Lubin, T. Luttermoser, B. Maas, K. Mace, F.  
503 Madeira, V. Mader, A. M. Cortesero, L. Marini, E. Martinez, H. M. Martinson, P.  
504 Menozzi, M. G. E. Mitchell, T. Miyashita, G. A. R. Molina, M. A. Molina-Montenegro, M.  
505 E. O'Neal, I. Opatovsky, S. Ortiz-Martinez, M. Nash, Ö. Östman, A. Ouin, D. Pak, D.  
506 Paredes, S. Parsa, H. Parry, R. Perez-Alvarez, D. J. Perović, J. A. Peterson, S. Petit, S. M.  
507 Philpott, M. Plantegenest, M. Plečaš, T. Pluess, X. Pons, S. G. Potts, R. F. Pywell, D. W.  
508 Ragsdale, T. A. Rand, L. Raymond, B. Ricci, C. Sargent, J.-P. Sarthou, J. Saulais, J.  
509 Schäckermann, N. P. Schmidt, G. Schneider, C. Schüepp, F. S. Sivakoff, H. G. Smith, K.  
510 Stack Whitney, S. Stutz, Z. Szendrei, M. B. Takada, H. Taki, G. Tamburini, L. J.  
511 Thomson, Y. Tricault, N. Tsafack, M. Tschumi, M. Valantin-Morison, M. Van Trinh, W.  
512 van der Werf, K. T. Vierling, B. P. Werling, J. B. Wickens, V. J. Wickens, B. A.  
513 Woodcock, K. Wyckhuys, H. Xiao, M. Yasuda, A. Yoshioka, and Y. Zou. 2018. Crop  
514 pests and predators exhibit inconsistent responses to surrounding landscape  
515 composition. *Proceedings of the National Academy of Sciences* 115:E7863–E7870.  
516 Katibah, E. E. 1984. A brief history of riparian forests in the Central Valley of California.  
517 Page *in* R. E. Warner and K. M. Hendrix, editors. *California riparian systems*.  
518 University of California Press, Berkeley, CA.  
519 Kleijn, D., R. Bommarco, T. P. M. Fijen, L. A. Garibaldi, S. G. Potts, and W. H. van der Putten.  
520 2019. Ecological Intensification: Bridging the Gap between Science and Practice.  
521 *Trends in Ecology & Evolution* 34:154–166.



- 522 Kremen, C., and A. M. Merenlender. 2018. Landscapes that work for biodiversity and  
523 people. *Science* 362:eaau6020.
- 524 Kross, S. M., K. P. Ingram, R. F. Long, and M. T. Niles. 2018. Farmer Perceptions and  
525 Behaviors Related to Wildlife and On-Farm Conservation Actions. *Conservation*  
526 *Letters* 11:e12364.
- 527 Kross, S. M., T. R. Kelsey, C. J. McColl, and J. M. Townsend. 2016. Field-scale habitat  
528 complexity enhances avian conservation and avian-mediated pest-control services  
529 in an intensive agricultural crop. *Agriculture, Ecosystems & Environment* 225:140–  
530 149.
- 531 Kross, S. M., J. M. Tylianakis, and X. J. Nelson. 2012. Effects of Introducing Threatened  
532 Falcons into Vineyards on Abundance of Passeriformes and Bird Damage to Grapes.  
533 *Conservation Biology* 26:142–149.
- 534 Long, R. F., S. E. Light, M. Galla, and J. Murdock. 2018. Sample Costs to Produce Sunflowers  
535 for Hybrid Seed in the Sacramento Valley, 2018:19.
- 536 Long, R., T. Gulya, S. Light, K. Bali, K. Mathesius, and R. D. Meyer. 2019. Sunflower Hybrid  
537 Seed Production in California. University of California, Agriculture and Natural  
538 Resources.
- 539 Losey, J. E., and M. Vaughan. 2006. The economic value of ecological services provided by  
540 insects. *Bioscience* 56:311–323.
- 541 Maas, B., S. Heath, I. Grass, C. Cassano, A. Classen, D. Faria, P. Gras, K. Williams-Guillén, M.  
542 Johnson, D. S. Karp, V. Linden, A. Martínez-Salinas, J. M. Schmack, and S. Kross. 2019.  
543 Experimental field enclosure of birds and bats in agricultural systems —

- 544 Methodological insights, potential improvements, and cost-benefit trade-offs. *Basic*  
545 *and Applied Ecology* 35:1–12.
- 546 Maine, J. J., and J. G. Boyles. 2015. Bats initiate vital agroecological interactions in corn.  
547 *Proceedings of the National Academy of Sciences* 112:12438–12443.
- 548 M’Gonigle, L. K., L. C. Ponisio, K. Cutler, and C. Kremen. 2015. Habitat restoration promotes  
549 pollinator persistence and colonization in intensively managed agriculture.  
550 *Ecological Applications* 25:1557–1565.
- 551 Morandin, L. A., R. F. Long, and C. Kremen. 2014. Hedgerows enhance beneficial insects on  
552 adjacent tomato fields in an intensive agricultural landscape. *Agriculture,*  
553 *Ecosystems & Environment* 189:164–170.
- 554 Peisley, R. K., M. E. Saunders, and G. W. Luck. 2016. Cost-benefit trade-offs of bird activity in  
555 apple orchards. *PeerJ* 4:e2179.
- 556 Pejchar, L., Y. Clough, J. Ekroos, K. A. Nicholas, O. Olsson, D. Ram, M. Tschumi, and H. G.  
557 Smith. 2018. Net Effects of Birds in Agroecosystems. *BioScience*.
- 558 Ponisio, L. C., P. de Valpine, L. K. M’Gonigle, and C. Kremen. 2019. Proximity of restored  
559 hedgerows interacts with local floral diversity and species’ traits to shape long-term  
560 pollinator metacommunity dynamics. *Ecology Letters* 22:1048–1060.
- 561 Rosenberg, K. V., A. M. Dokter, P. J. Blancher, J. R. Sauer, A. C. Smith, P. A. Smith, J. C. Stanton,  
562 A. Panjabi, L. Helft, M. Parr, and P. P. Marra. 2019. Decline of the North American  
563 avifauna. *Science* 366:120–124.
- 564 Sardiñas, H. S., K. Tom, L. C. Ponisio, A. Rominger, and C. Kremen. 2016. Sunflower (  
565 *Helianthus annuus* ) pollination in California’s Central Valley is limited by native bee  
566 nest site location. *Ecological Applications* 26:438–447.

- 567 Schäckermann, J., N. Weiss, H. von Wehrden, and A.-M. Klein. 2014. High trees increase  
568 sunflower seed predation by birds in an agricultural landscape of Israel. *Frontiers in*  
569 *Ecology and Evolution* 2.
- 570 Seavy, N. E., J. H. Viers, and J. K. Wood. 2009. Riparian bird response to vegetation structure:  
571 a multiscale analysis using LiDAR measurements of canopy height. *Ecological*  
572 *Applications* 19:1848–1857.
- 573 Settele, J., and W. H. Settle. 2018. Conservation biological control: Improving the science  
574 base. *Proceedings of the National Academy of Sciences* 115:8241–8243.
- 575 Weier, S. M., I. Grass, V. M. G. Linden, T. Tschardt, and P. J. Taylor. 2018. Natural  
576 vegetation and bug abundance promote insectivorous bat activity in macadamia  
577 orchards, South Africa. *Biological Conservation* 226:16–23.
- 578

579 FIGURE LEGENDS

580 Figure 1: Map showing sunflower field locations at varying distances from natural habitat (blue)  
581 across an intensive agriculture landscape. Sunflower fields had either bare/weedy field margin  
582 habitat (red points), or had woody vegetation field margin habitat (white points).

583

584 Figure 2: Model estimates of percent of sunflower seeds damaged as a function of the presence  
585 (darker colored lines) or absence (lighter colored lines) of woody vegetation along field edges  
586 and, a) an orthogonal axis for field margin habitat type, b) the distance to the nearest natural  
587 habitats; and c) percent seeds damaged by birds as a function of the distance of sampling  
588 points within each field from the nearest field margin.

589

590 Figure 3: Avian species richness and abundance along sunflower field edges and within  
591 sunflower field interiors in Summer (top row) and Fall (bottom row) as a function of increasing  
592 field margin habitat height, width, and number of canopy layers (-PC1). Statistical significance  
593 of PC1 variable as a predictor in a linear regression for each response variable is shown bottom  
594 right in each panel.

595 FIGURE 1

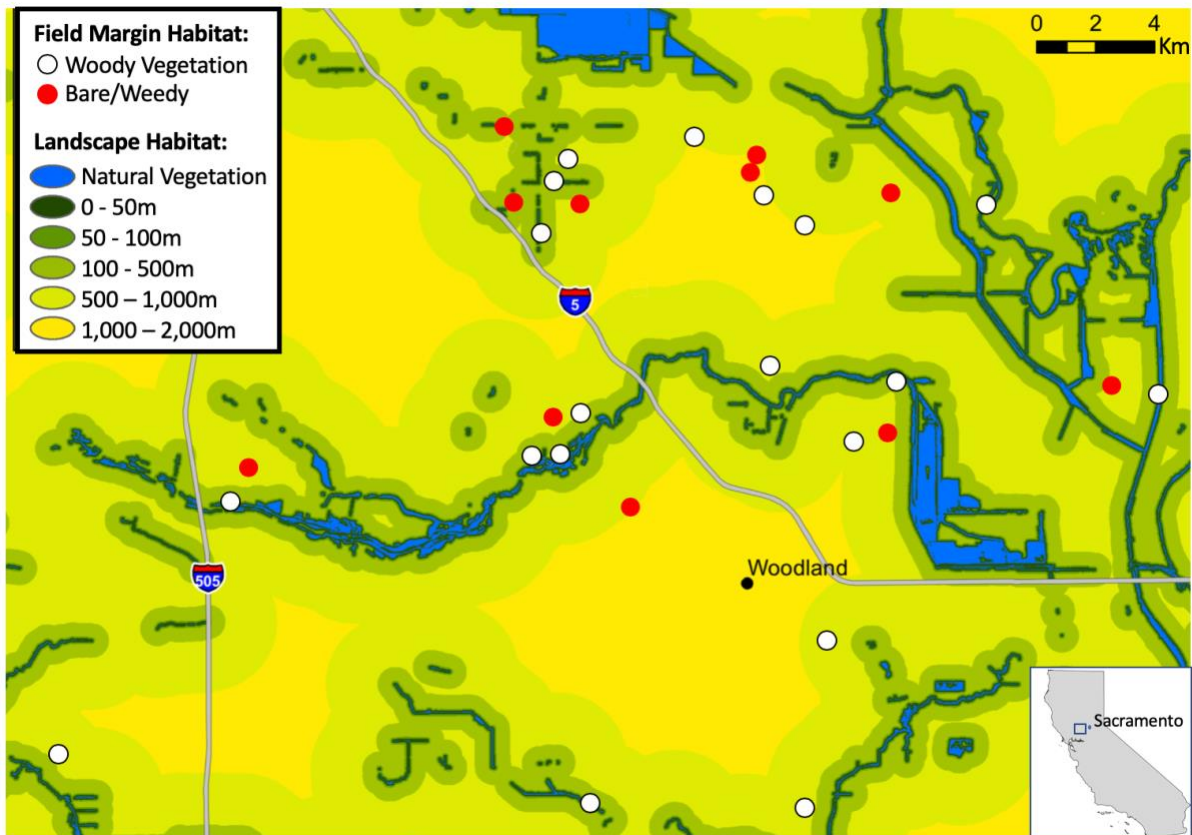

596

597 Figure 1: Map showing sunflower field locations at varying distances from natural habitat (blue)  
598 across an intensive agriculture landscape around the city of Woodland in the Sacramento Valley  
599 of California. Sunflower fields had either bare/weedy field margin habitat (red points), or had  
600 woody vegetation field margin habitat (white points).

601 FIGURE 2

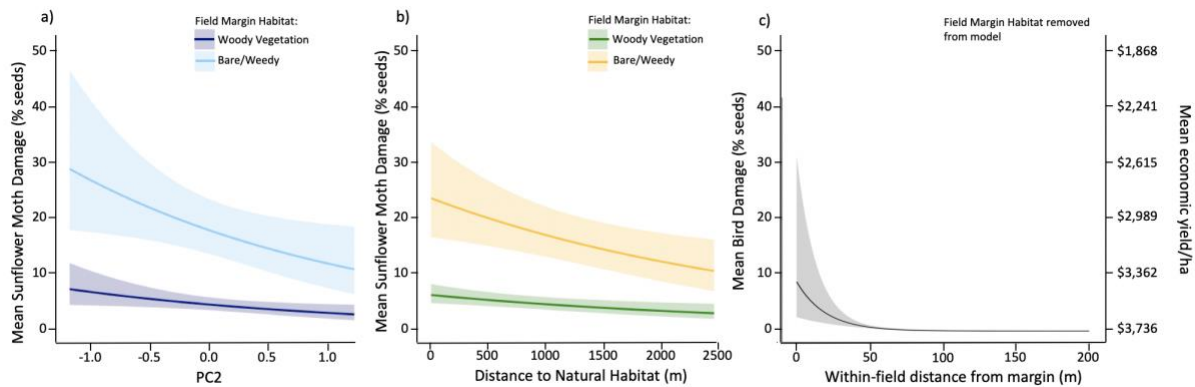

602

603 Figure 2: Model estimates of percent of sunflower seeds damaged as a function of the presence  
604 (darker colored lines) or absence (lighter colored lines) of woody vegetation along field edges  
605 and, a) an orthogonal axis for field margin habitat type, b) the distance to the nearest natural  
606 habitats; and c) percent seeds damaged by birds as a function of the distance of sampling  
607 points within each field from the nearest field margin. The mean economic yield per hectare is  
608 shown as a secondary y-axis and applies to all three panels.

609 FIGURE 3

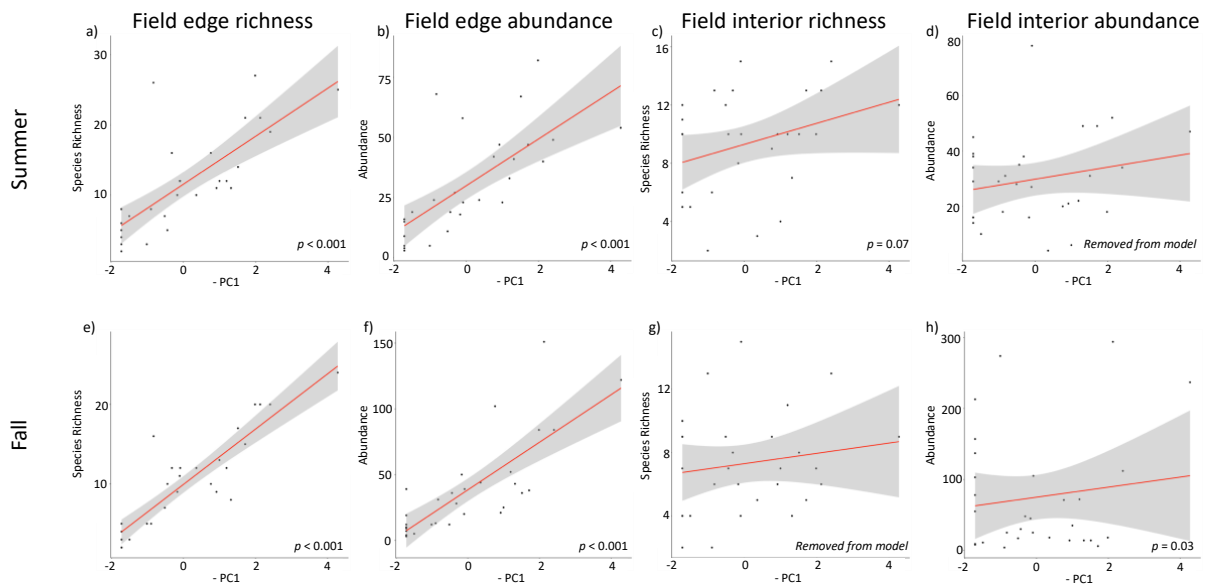

610

611 Figure 3: Avian species richness and abundance along sunflower field edges and within  
612 sunflower field interiors in Summer (top row) and Fall (bottom row) as a function of increasing  
613 field margin habitat height, width, and number of canopy layers (- PC1). Statistical significance  
614 of PC1 variable as a predictor in a linear regression for each response variable is shown bottom  
615 right in each panel.

616

617

618

619

620

621

622

623 **Supplementary Material**

624 Supplementary Table 1: Model selection for candidate models explaining sunflower moth  
625 damage to sunflower seeds using the distance to nearest natural habitat as a measure of  
626 landscape-scale habitat complexity. A principal components analysis was used to consolidate  
627 local habitat complexity variables into two orthogonal axes (PC1 and PC2). Field margins for  
628 each site were categorically defined based on the presence or absence of woody vegetation  
629 along the field margin. The 'Distance into Field' measure is the number of meters within the  
630 field for each sampling location from the nearest field edge.

631

632

| Name                                                                 | Residual df | Residual Deviance | $\Delta$ AIC | $w_i$ |
|----------------------------------------------------------------------|-------------|-------------------|--------------|-------|
| Field Margin + Distance to Natural + PC2                             | 190         | 218               | 0            | 0.48  |
| Field Margin + Distance to Natural + PC1 + PC2                       | 189         | 218               | 1.7          | 0.2   |
| Field Margin + Distance to Natural + PC1                             | 190         | 219               | 3.1          | 0.1   |
| Field Margin + Distance to Natural                                   | 191         | 219               | 3.2          | 0.09  |
| Field Margin + Distance to Natural + Distance into field + PC1 + PC2 | 188         | 218               | 3.3          | 0.09  |
| Field Margin * Distance to Natural + Distance into field + PC1 + PC2 | 187         | 218               | 5.3          | 0.03  |
| Null                                                                 | 193         | 222               | 42.4         | 0     |

633

634 Supplementary Table 2: Model selection for candidate models explaining sunflower moth  
635 damage to sunflower seeds using, as a measure of landscape-scale habitat complexity, the  
636 proportion of natural habitat within concentric distance buffers from each site. Only the  
637 landscape-scale habitat variable is shown changed in this table based on the most parsimonious  
638 model above. A principal components analysis was used to consolidate local habitat complexity



639 variables into two orthogonal axes (PC1 and PC2). Field margins for each site were categorically  
640 defined based on the presence or absence of woody vegetation along the field margin.

| Model Terms                              | Residual df | Residual Deviance | $\Delta$ AIC | $w_i$ |
|------------------------------------------|-------------|-------------------|--------------|-------|
| Field Margin + Distance to Natural + PC2 | 190         | 218               | 0            | 0.59  |
| Field Margin + Prop. Natural 800m + PC2  | 190         | 219               | 1.9          | 0.23  |
| Field Margin + Prop. Natural 200m + PC2  | 190         | 219               | 4.8          | 0.05  |
| Field Margin + Prop. Natural 100m + PC2  | 190         | 219               | 5            | 0.05  |
| Field Margin + Prop. Natural 50m + PC2   | 190         | 219               | 5.4          | 0.04  |
| Field Margin + Prop. Natural 400m + PC2  | 190         | 219               | 5.5          | 0.04  |
| Null                                     | 193         | 222               | 42.4         | 0     |

641
